# Supplementary material for: Hyaline Cartilage Microtissues Engineered from Adult Dedifferentiated Chondrocytes: Safety and Role of WNT Signaling
Source: PubMed Central journal article supplement — Stem Cells Transl Med. 2022 Nov 1;11(12):1219–31. doi: 10.1093/stcltm/szac074 (PMC9801297; doi:10.1093/stcltm/szac074), 2022-11-01
Supplement: szac074_suppl_supplementary_material.pdf [file szac074_suppl_supplementary_material.pdf]

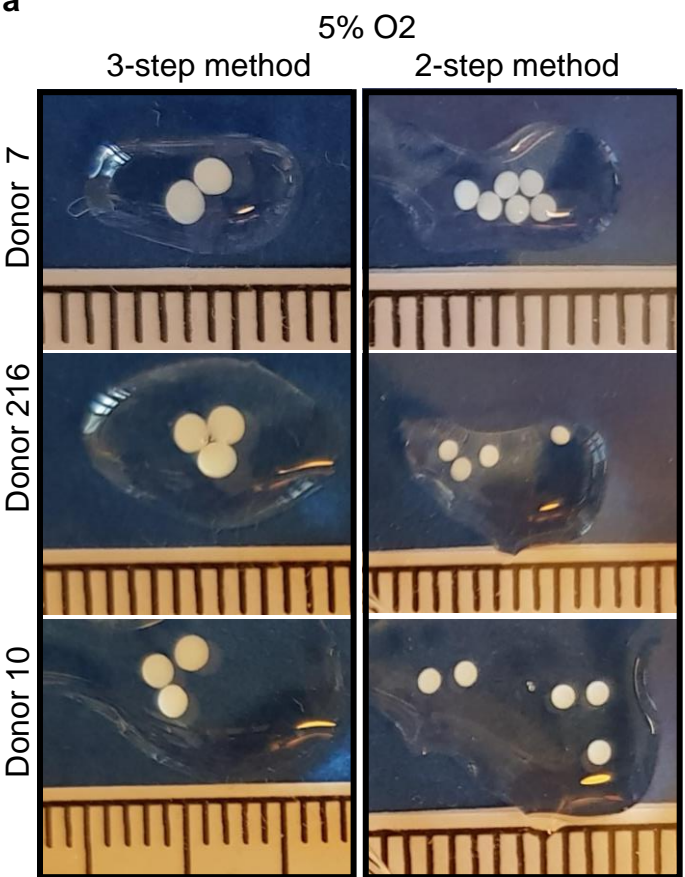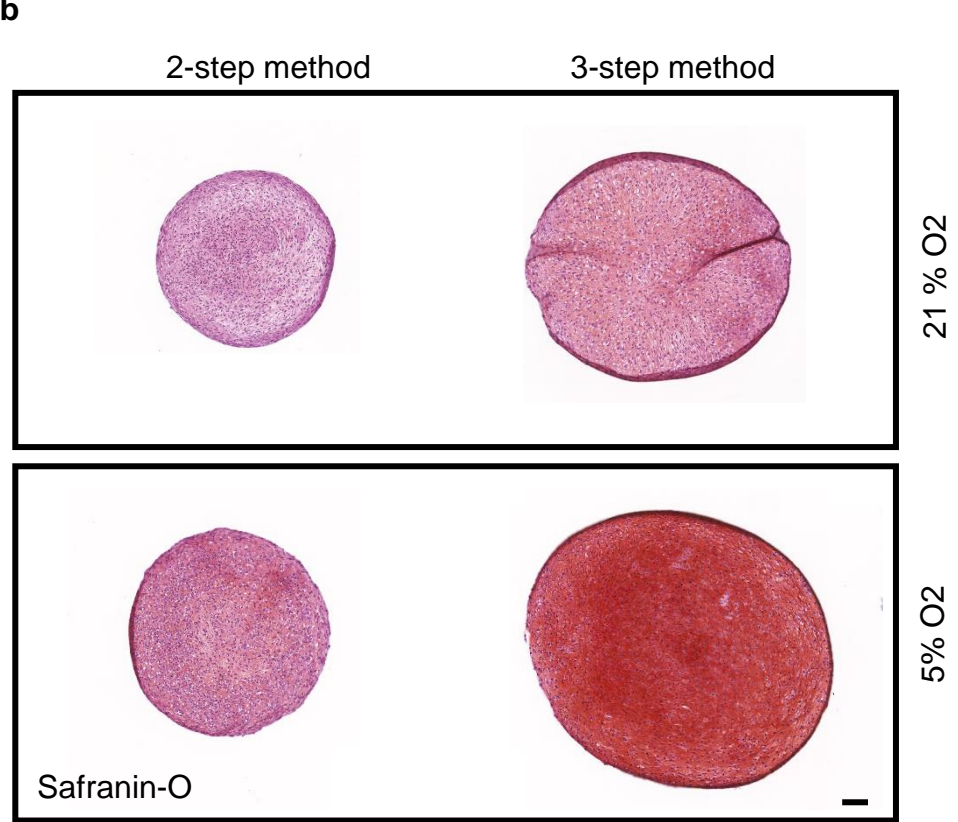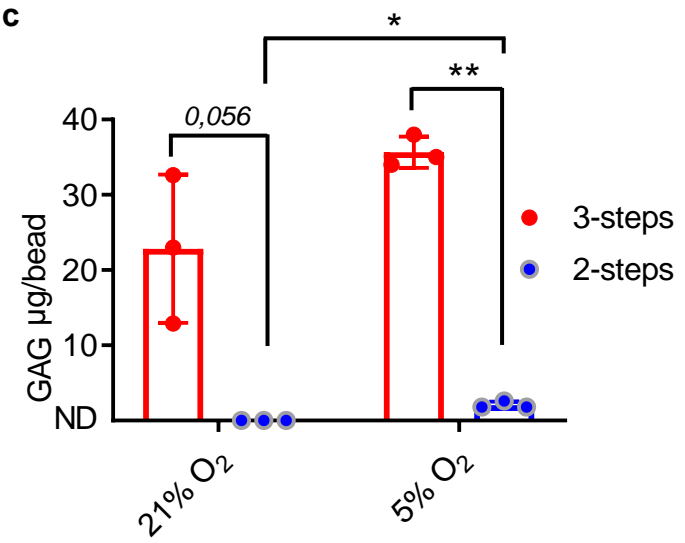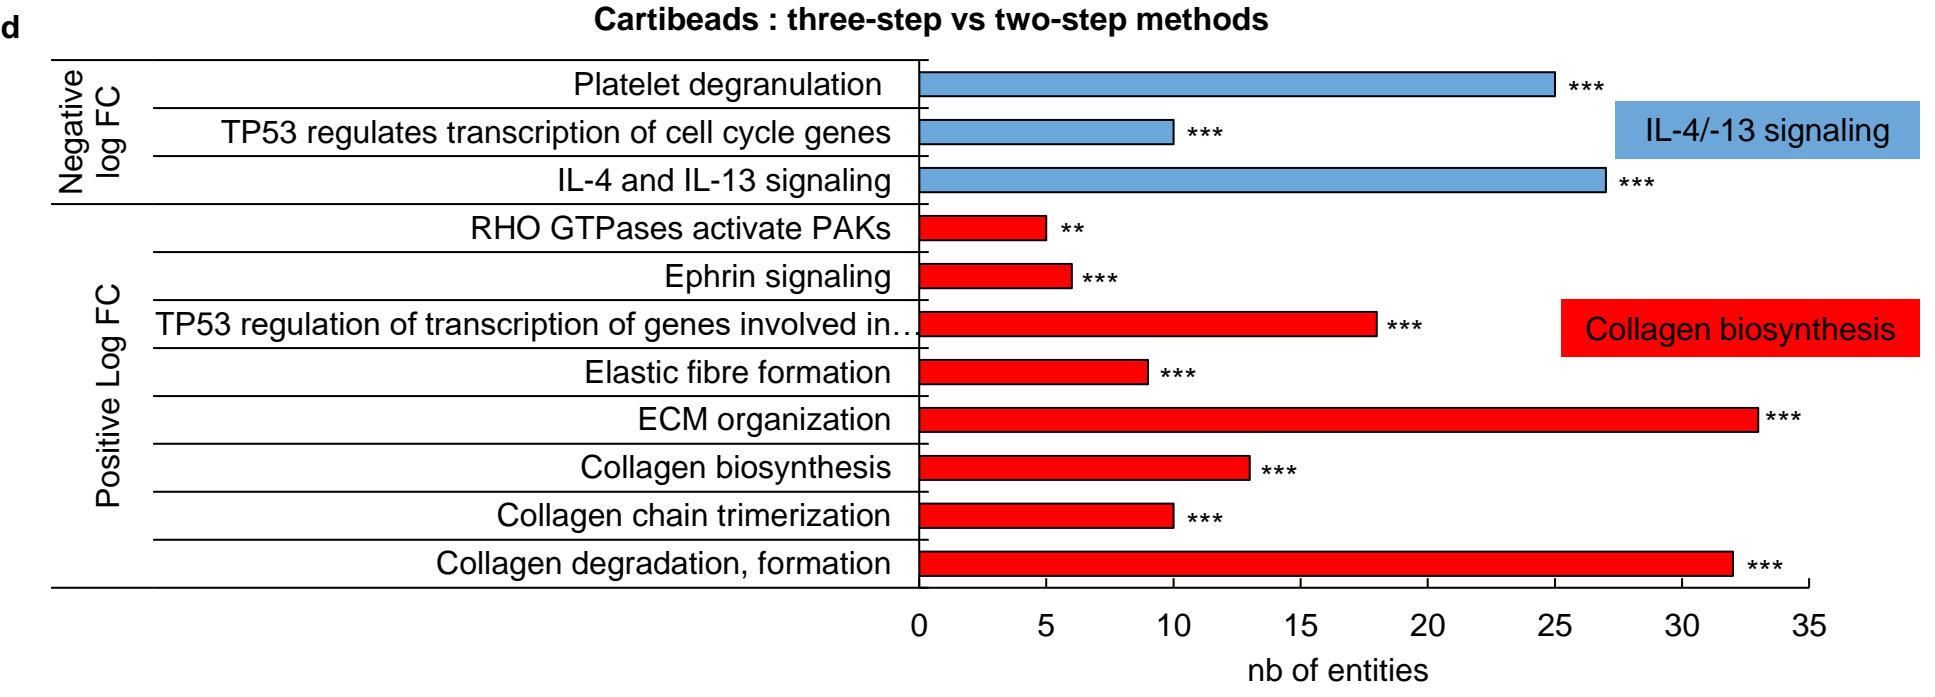

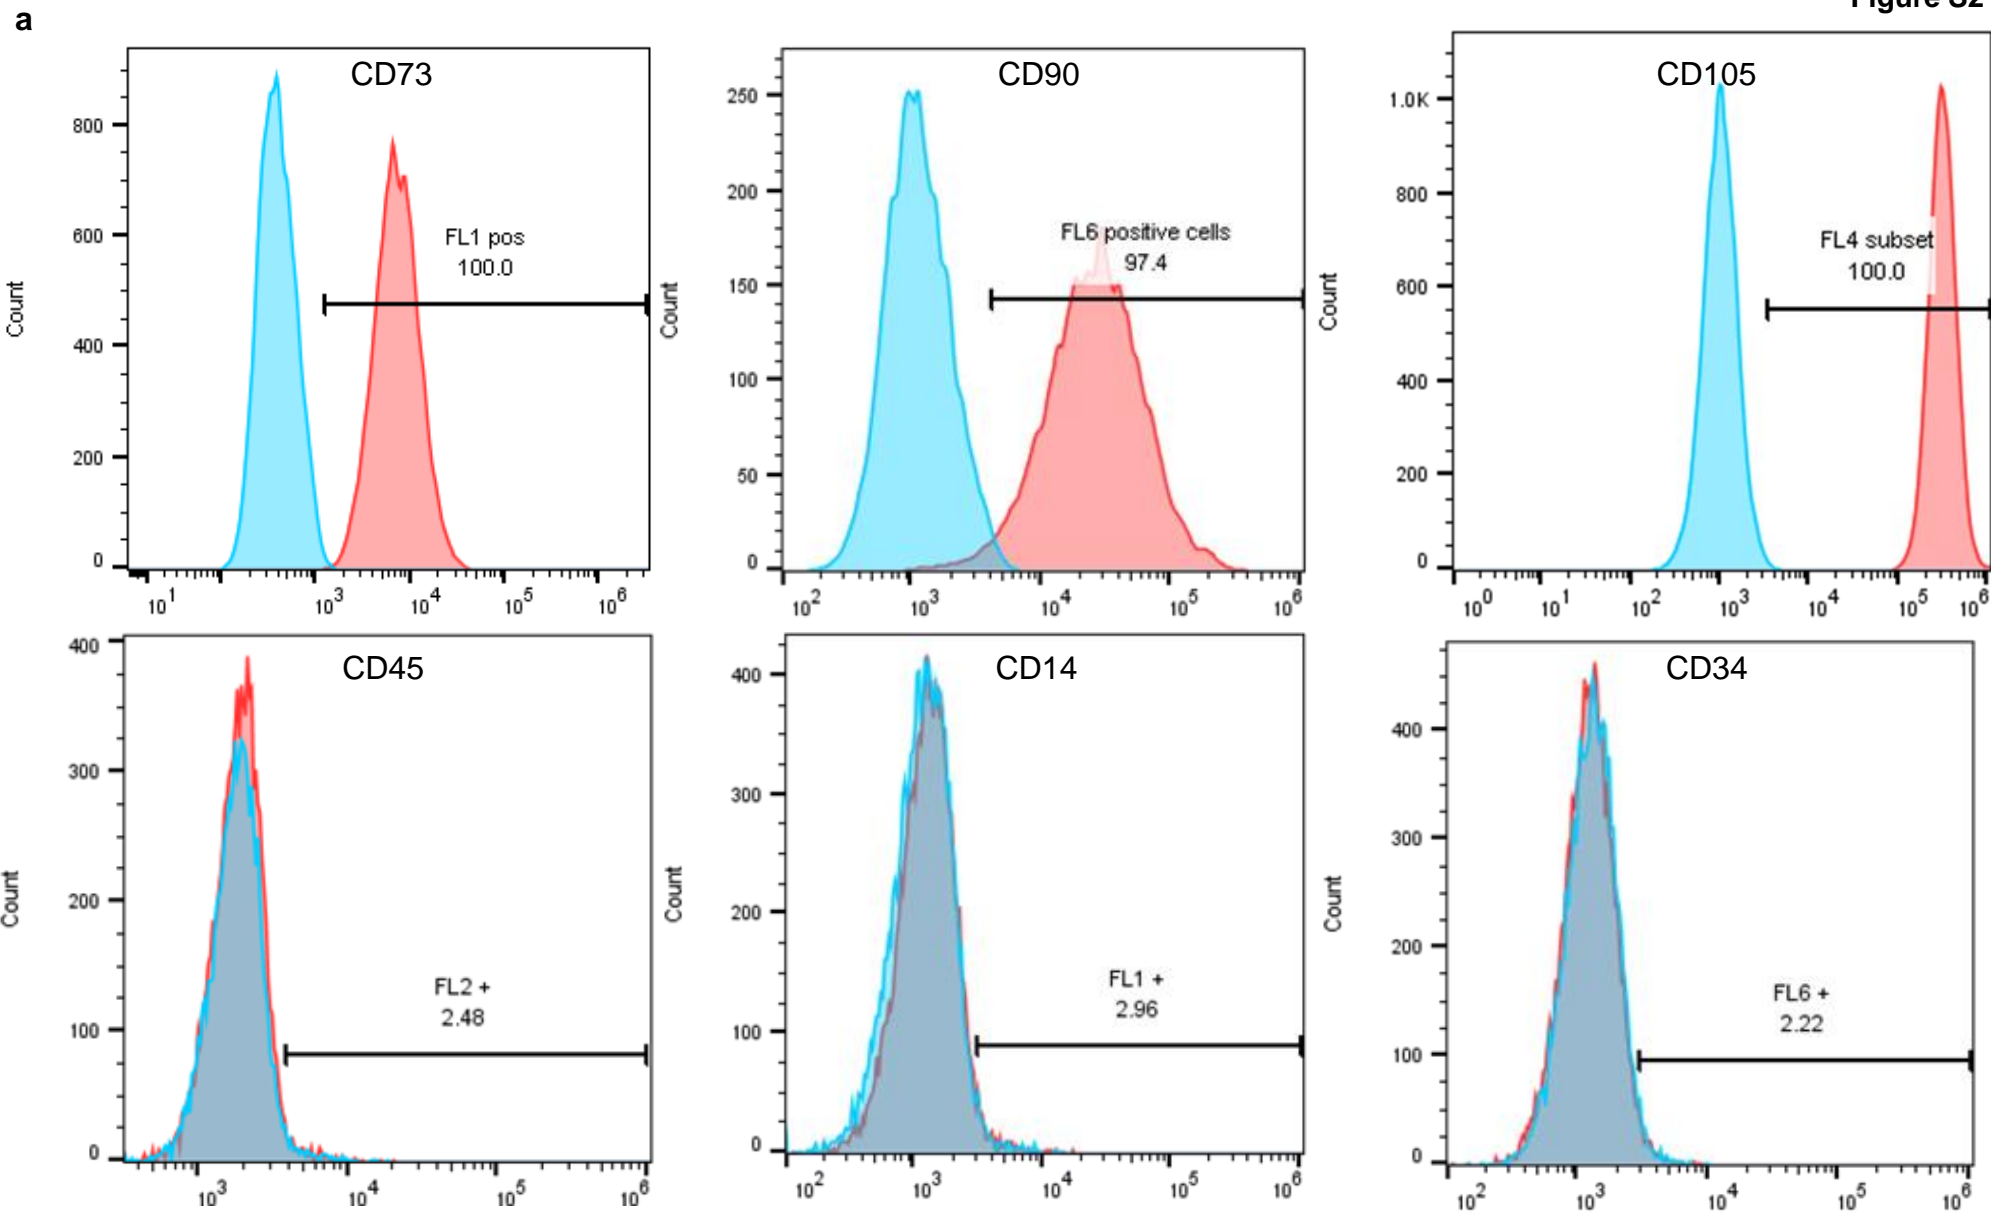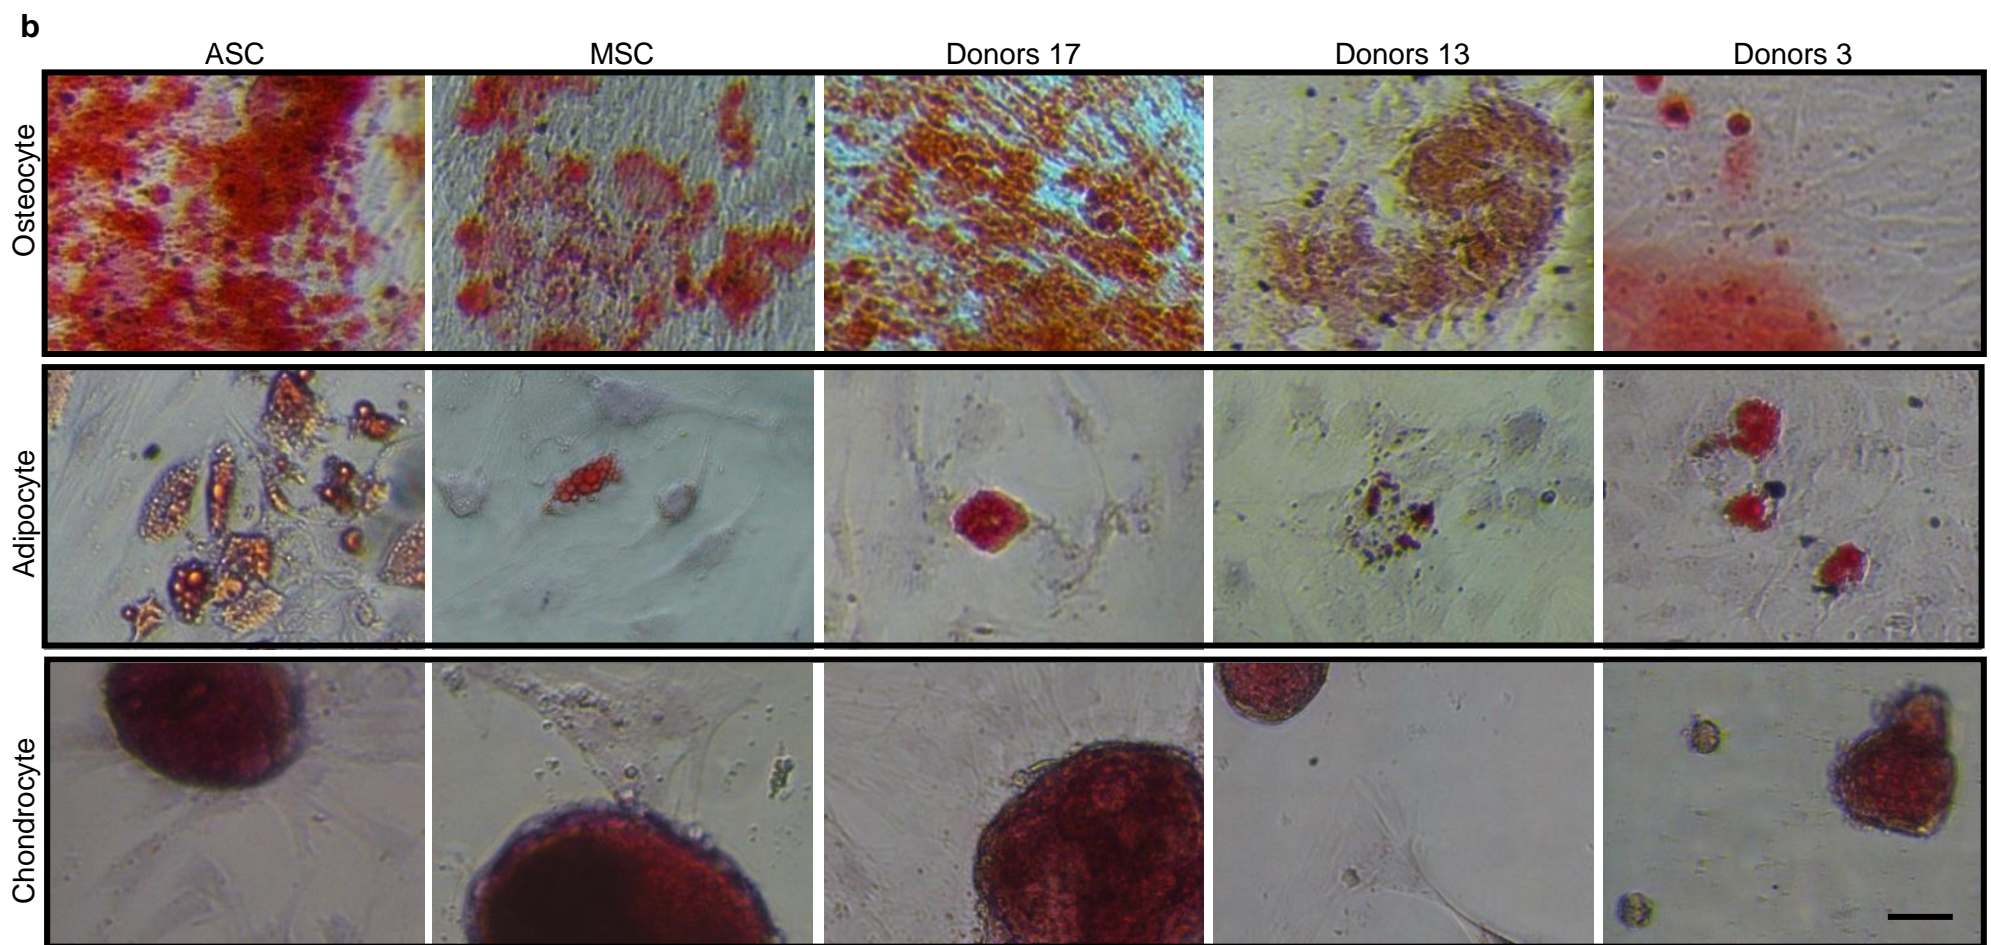

| <b>ID</b> | <b>Sex</b> | <b>Age</b> | <b>Pathology</b>           |
|-----------|------------|------------|----------------------------|
| Donor 1   | M          | 21         | Knee trauma                |
| Donor 2   | M          | 47         | Knee trauma                |
| Donor 3   | M          | 29         | Knee trauma                |
| Donor 4   | F          | 65         | Knee osteoarthritis        |
| Donor 5   | M          | 80         | Knee osteoarthritis        |
| Donor 6   | F          | 64         | Knee osteoarthritis        |
| Donor 7   | M          | 69         | Knee osteoarthritis        |
| Donor 8   | M          | 87         | Femoral condyl necrosis    |
| Donor 9   | F          | 28         | Patellar dislocation       |
| Donor 10  | M          | 58         | Degenerative focal lesion  |
| Donor 11  | F          | 60         | Knee osteoarthritis        |
| Donor 12  | M          | 38         | Osteochondrosis Dissecance |
| Donor 13  | M          | 68         | Knee osteoarthritis        |
| Donor 14  | M          | 63         | Knee osteoarthritis        |
| Donor 15  | F          | 74         | Knee osteoarthritis        |
| Donor 16  | M          | 82         | Knee osteoarthritis        |
| Donor 17  | M          | 76         | Ankle arthrosis            |
| Donor 18  | F          | 70         | Ankle arthrosis            |
| Donor 19  | M          | 74         | Ankle arthrosis            |
| Donor 20  | F          | 70         | Knee osteoarthritis        |
| Donor 21  | M          | 73         | Knee osteoarthritis        |
| Donor 22  | M          | 76         | Knee osteoarthritis        |

|       | Donor 16 | Donor 7 | Donor 10 |
|-------|----------|---------|----------|
| CD73  | 99.7     | 99.8    | 99.6     |
| CD90  | 93.2     | 99.7    | 99.7     |
| CD105 | 89.2     | 92.9    | 90.7     |

| Donor (CGH array) | Cell passage | Deletions | Duplications |
|-------------------|--------------|-----------|--------------|
| Donor 2 (M, 47)   | P3 & P11     | nd        | nd           |
| Donor 3 (M, 29)   | P4 & P8      | nd        | nd           |
| Donor 4 (F, 65)   | P4           | nd        | nd           |
| Donor 5 (M, 80)   | P4           | Y loss    | nd           |
| Donor 6 (F, 64)   | P5           | nd        | nd           |
| Donor 7 (M, 69)   | P5           | nd        | nd           |
| Donor 10 (M, 58)  | P4           | nd        | nd           |
| Donor 12 (M, 38)  | P4           | nd        | nd           |
| Donor 13 (M, 68)  | P5           | Y loss    | nd           |
| Donor 14 (M, 63)  | P3           | Y loss    | nd           |

Nd = not detected

| Implant source        | Cell passage | Mice implanted | Tumor (6 months) |
|-----------------------|--------------|----------------|------------------|
| Donor 2 (M, 47)       | P3           | 10             | 0                |
| Donor 3 (M, 29)       | P6           | 10             | 0                |
| Donor 11 (F, 60)      | P3           | 10             | 0                |
| Donor 12 (M, 38)      | P6           | 14             | 0                |
| Donor 15 (F, 74)      | P4           | 10             | 0                |
| A549 (adenocarcinoma) |              | 8              | 100% (6 weeks)   |

Study mice at 6 months, normal skin and internal organs

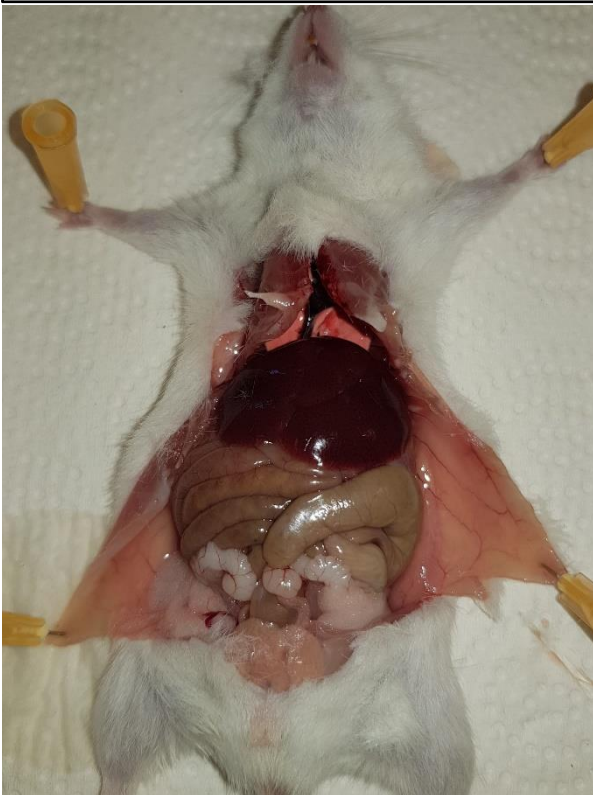

Control mice at 6 weeks with internal organs damage (arrows show haemorrhaging)

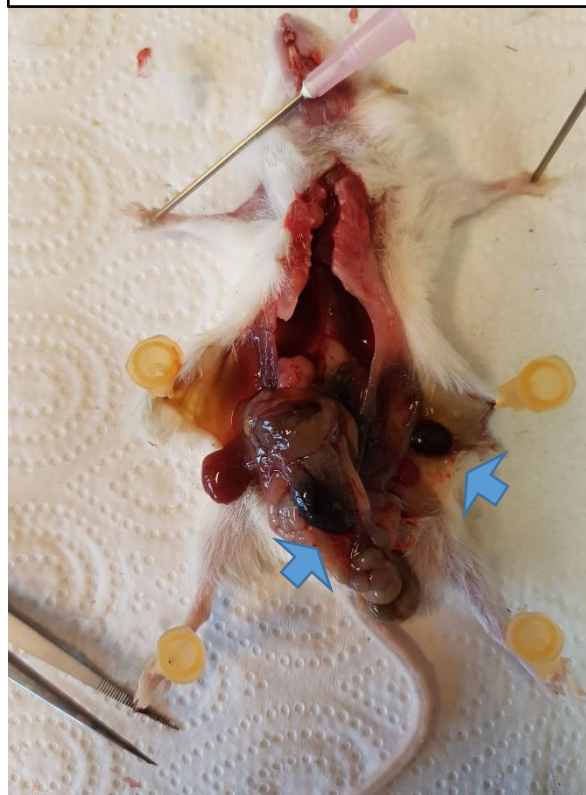

| Gene          | Gene name                      | Nucleotide sequence |                      | Size amplicon |
|---------------|--------------------------------|---------------------|----------------------|---------------|
| <i>ACAN</i>   | Aggrecan                       | Fwd                 | AAGTCGTGGTGAAAGGCATC | 109 pb        |
|               |                                | Rev                 | GCAATGATGGCACTGTTCTG |               |
| <i>COL2A1</i> | Collagen type II alpha 1 chain | Fwd                 | CTGGAAAAGCTGGTGAAAGG | Size 105 pb   |
|               |                                | Rev                 | GGCCTGGATAACCTCTGTGA |               |
